# Supplementary material for: Discovery of potential ovicidal natural products using metabolomics
Source: PubMed Central journal article supplement (PMC6347362; doi:10.1371/journal.pone.0211237), 2019-01-25

**S2 Fig.** MS/MS spectra of the identified compounds (Table 4).

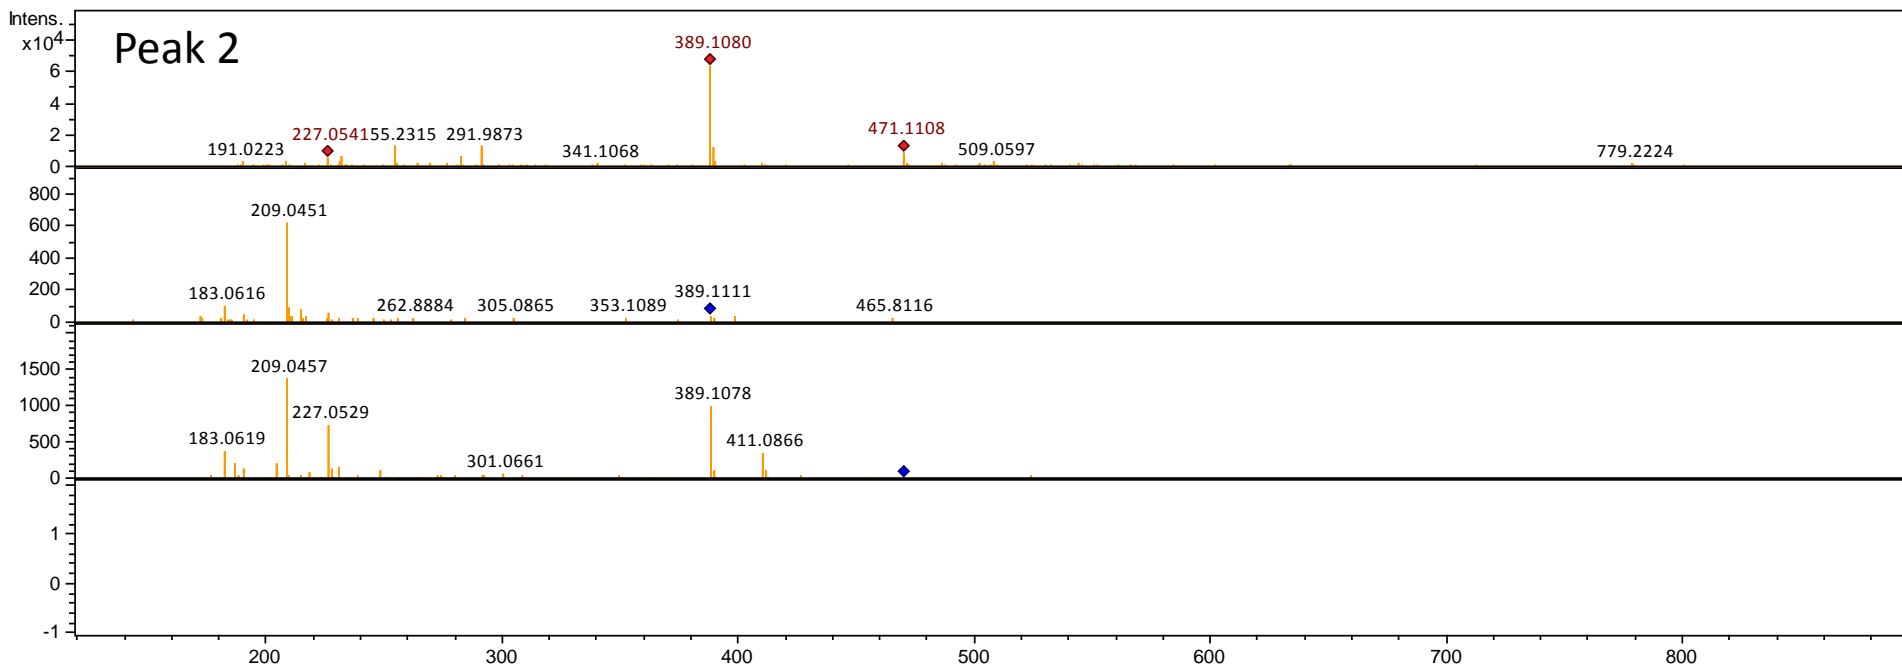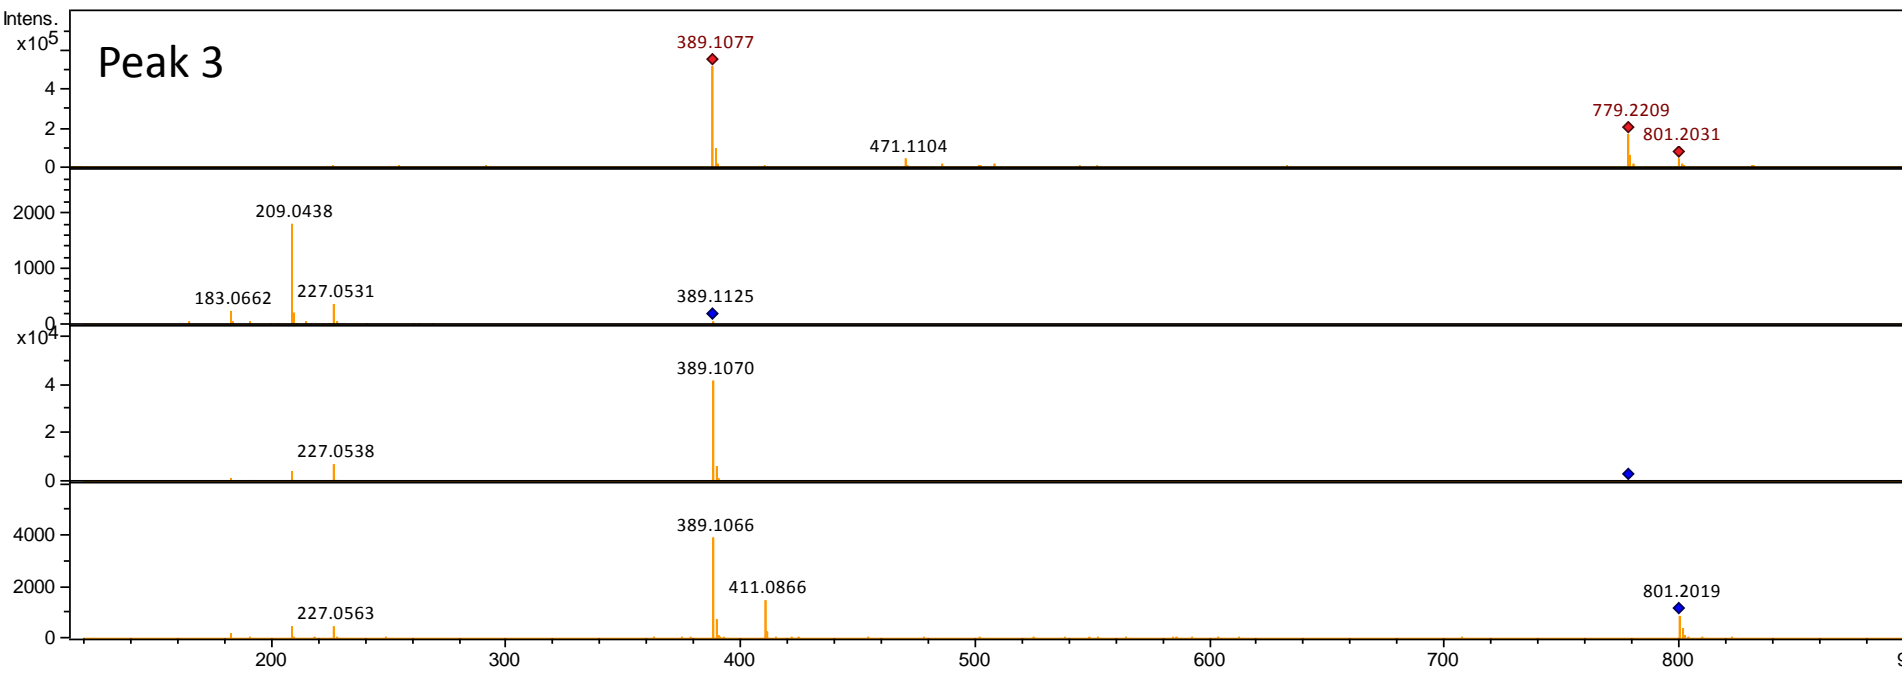

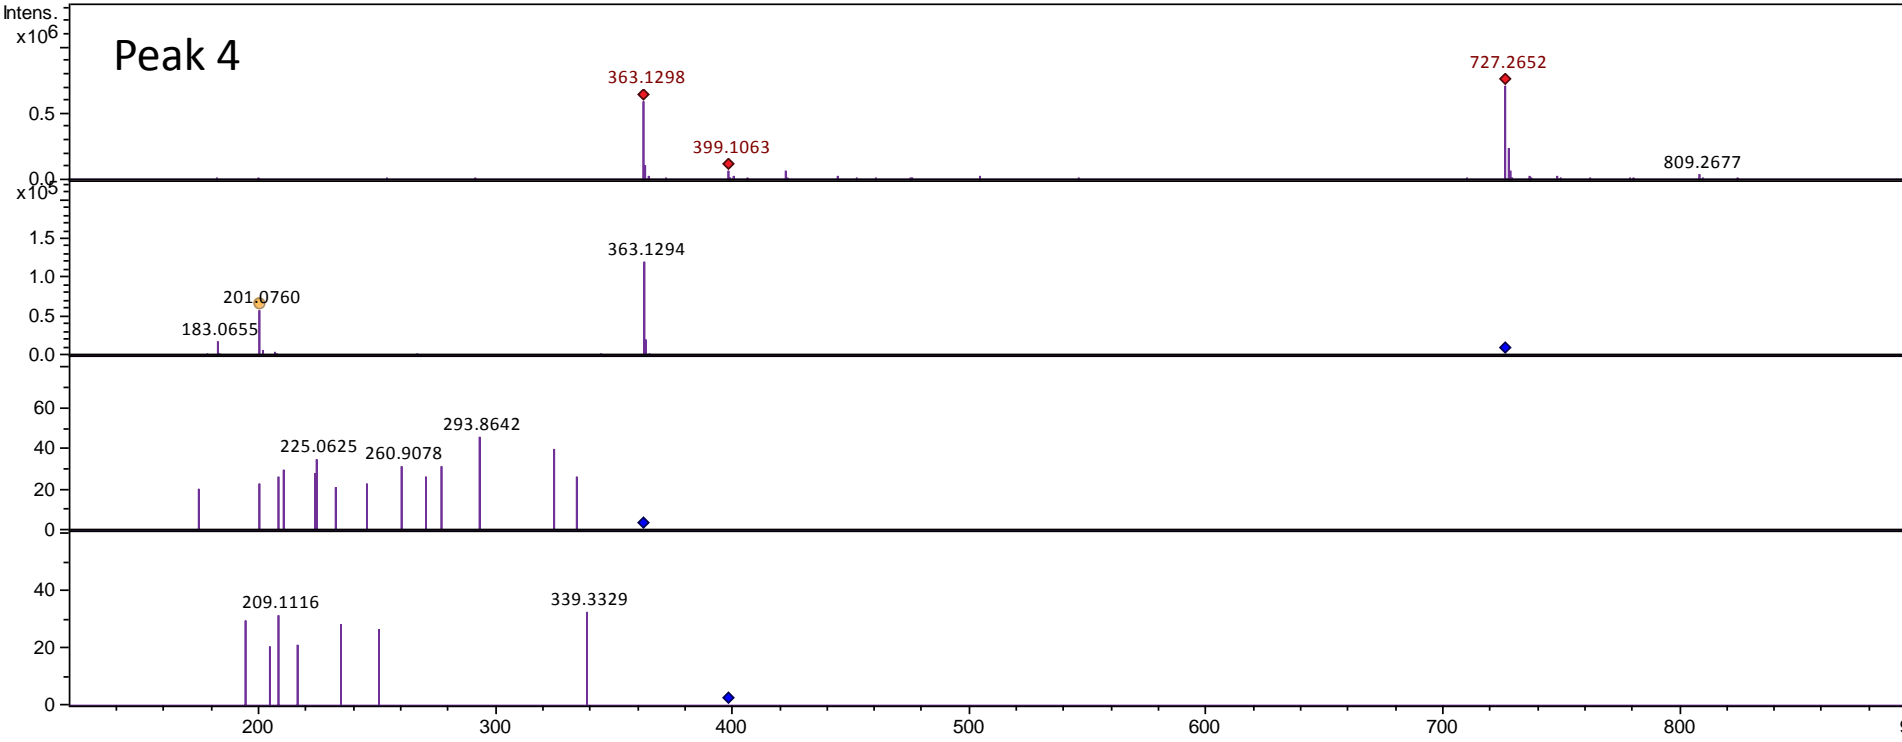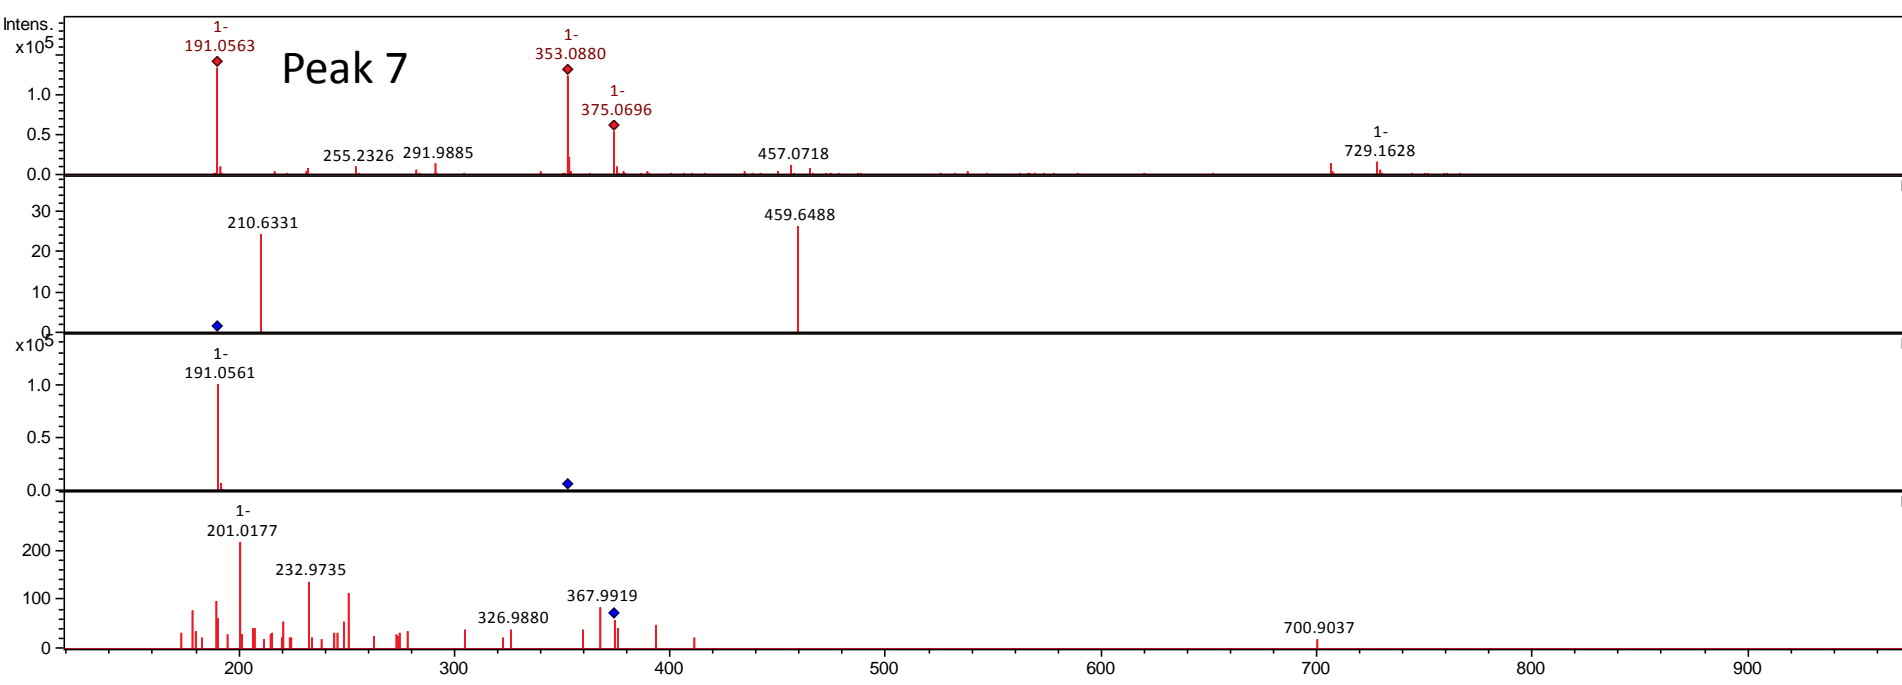

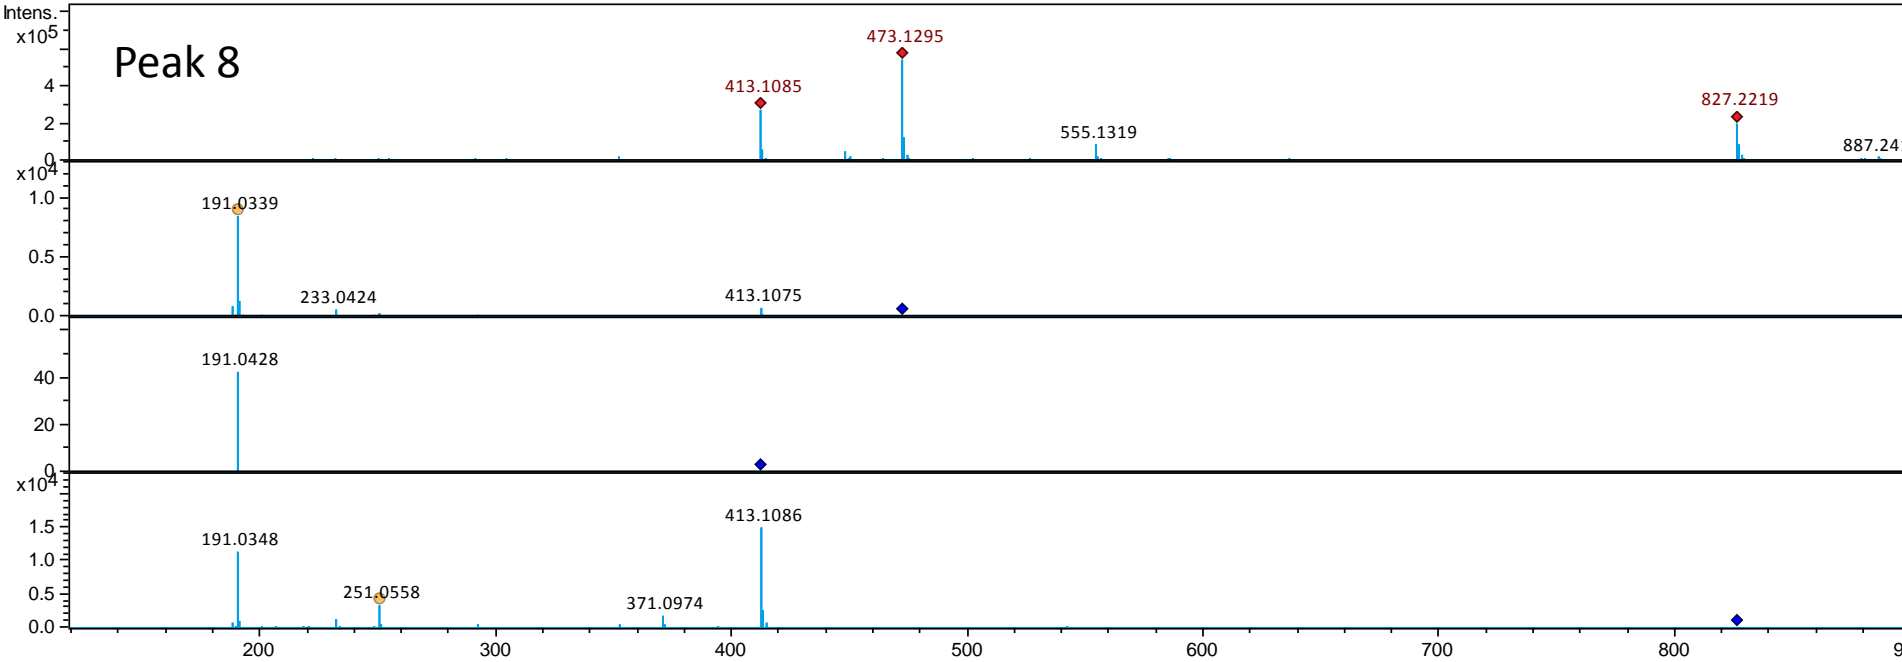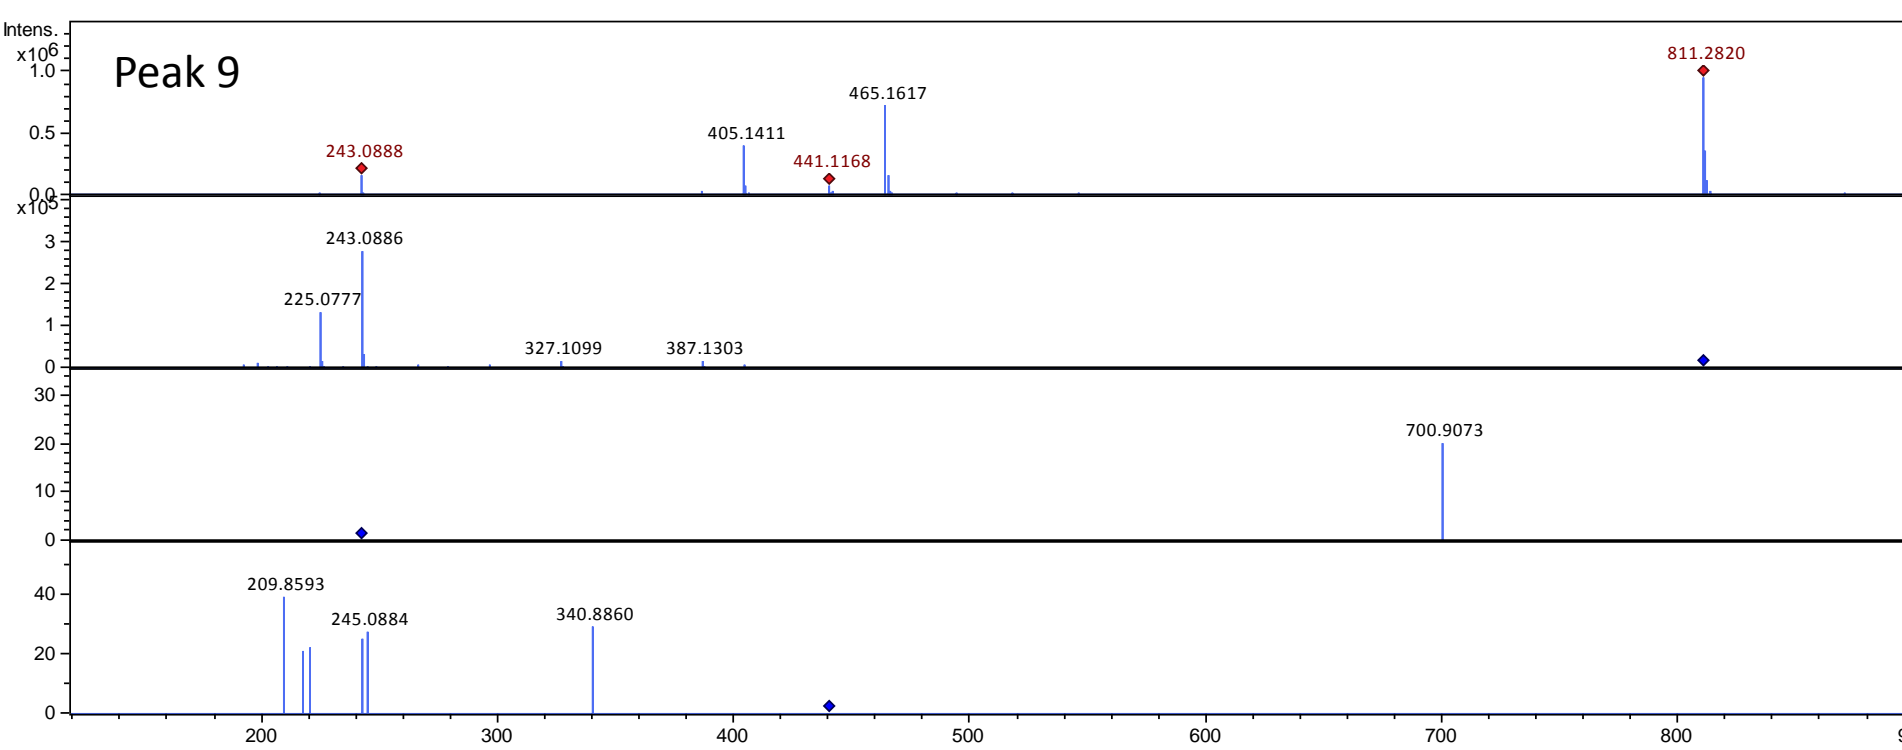

# Peak 10/11

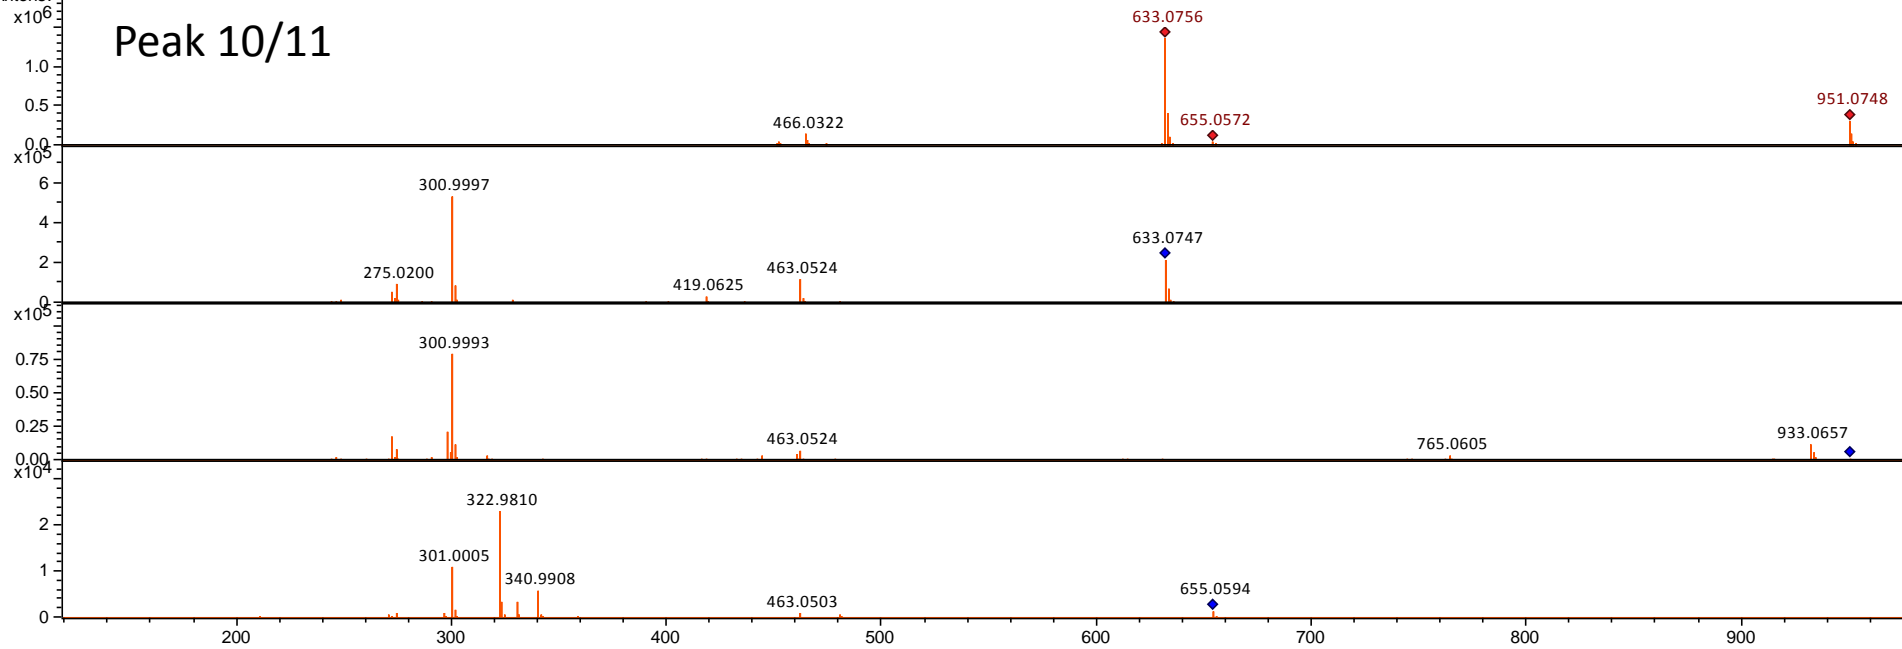

# Peak 12

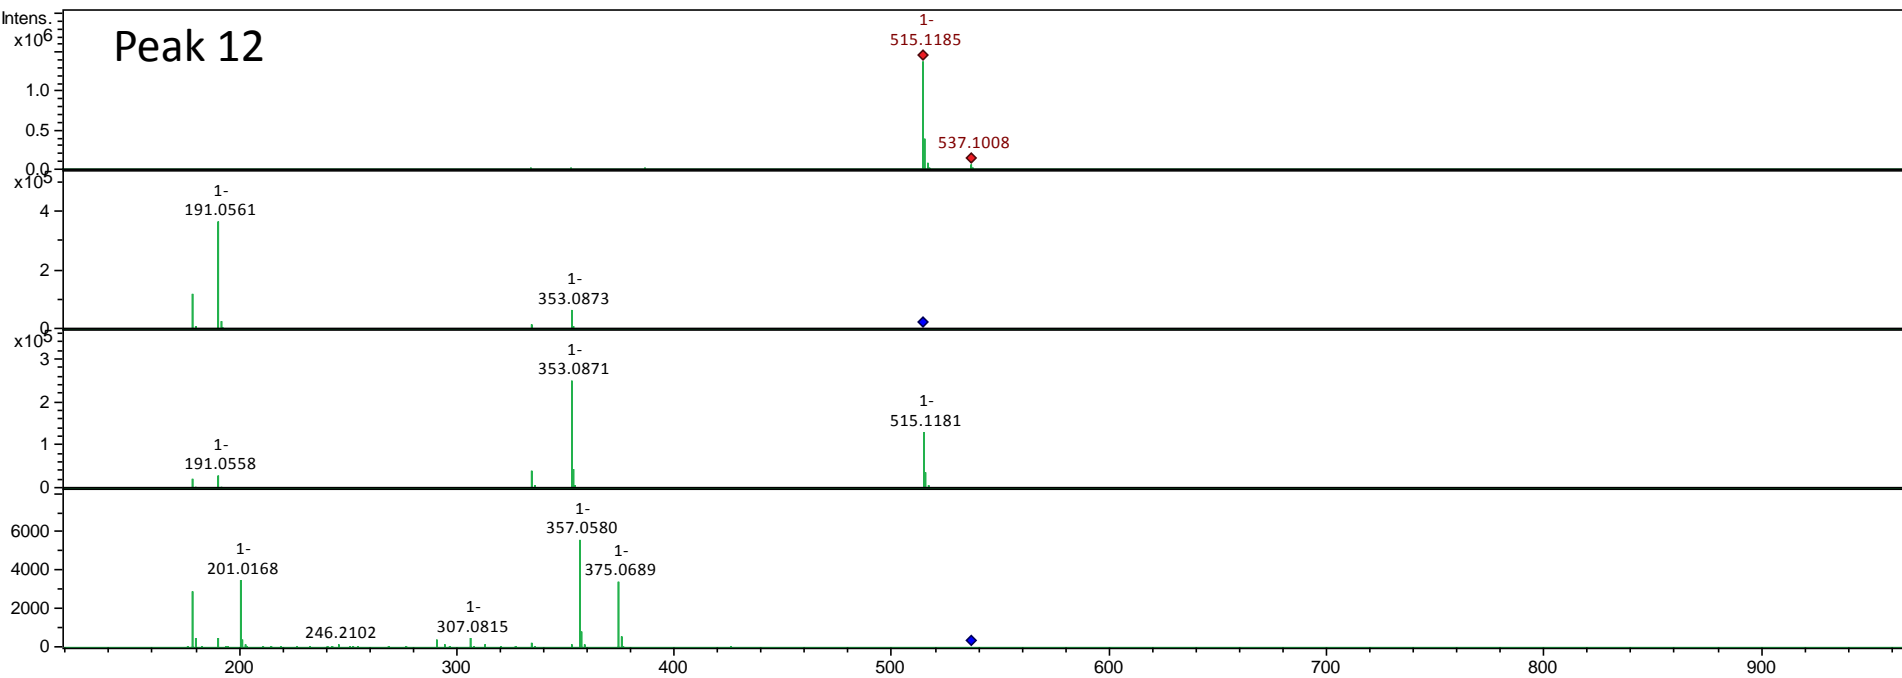

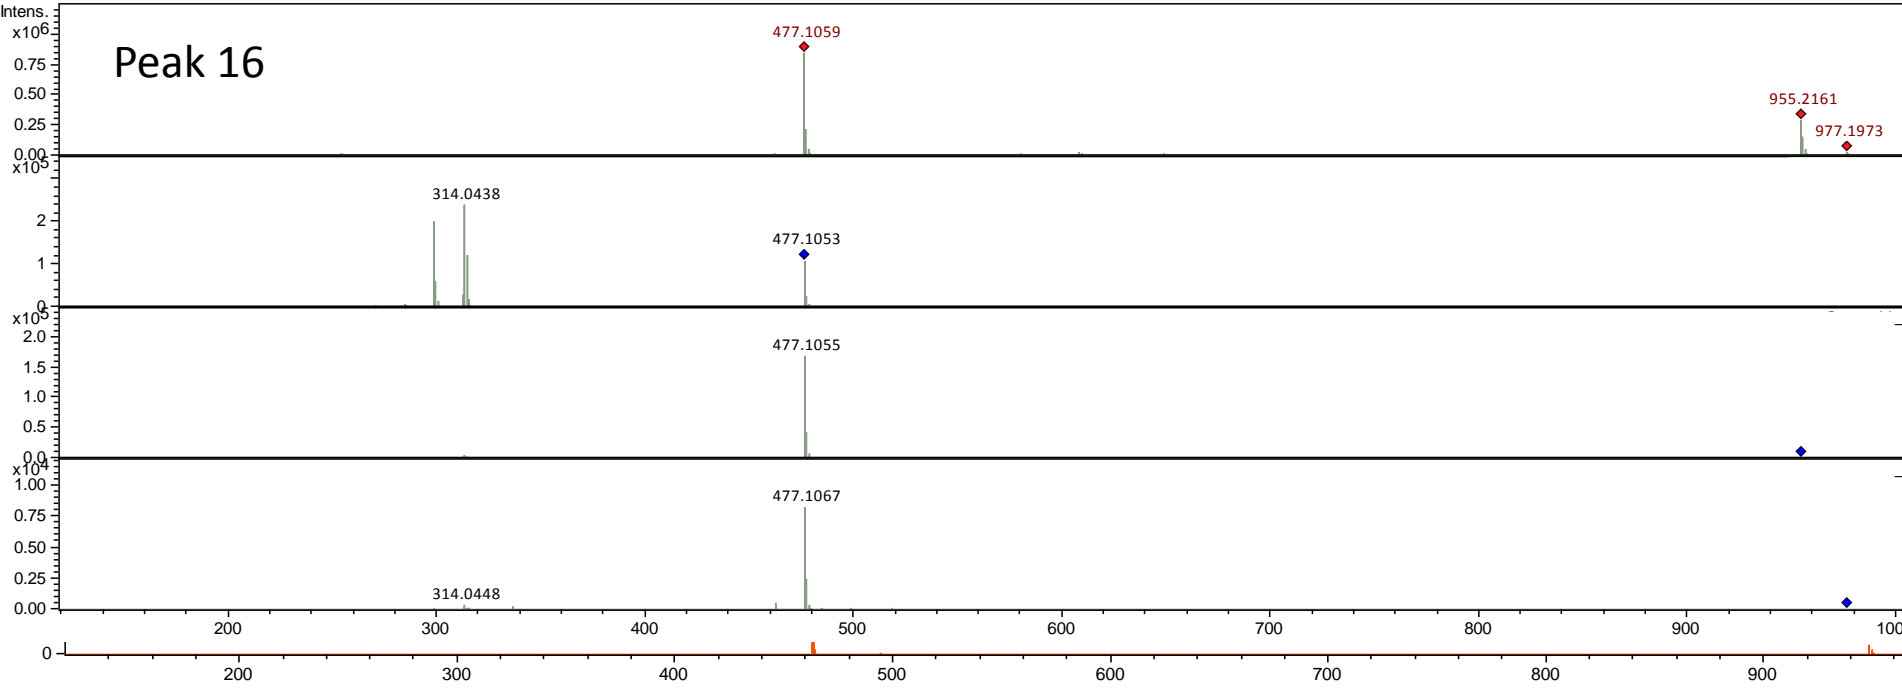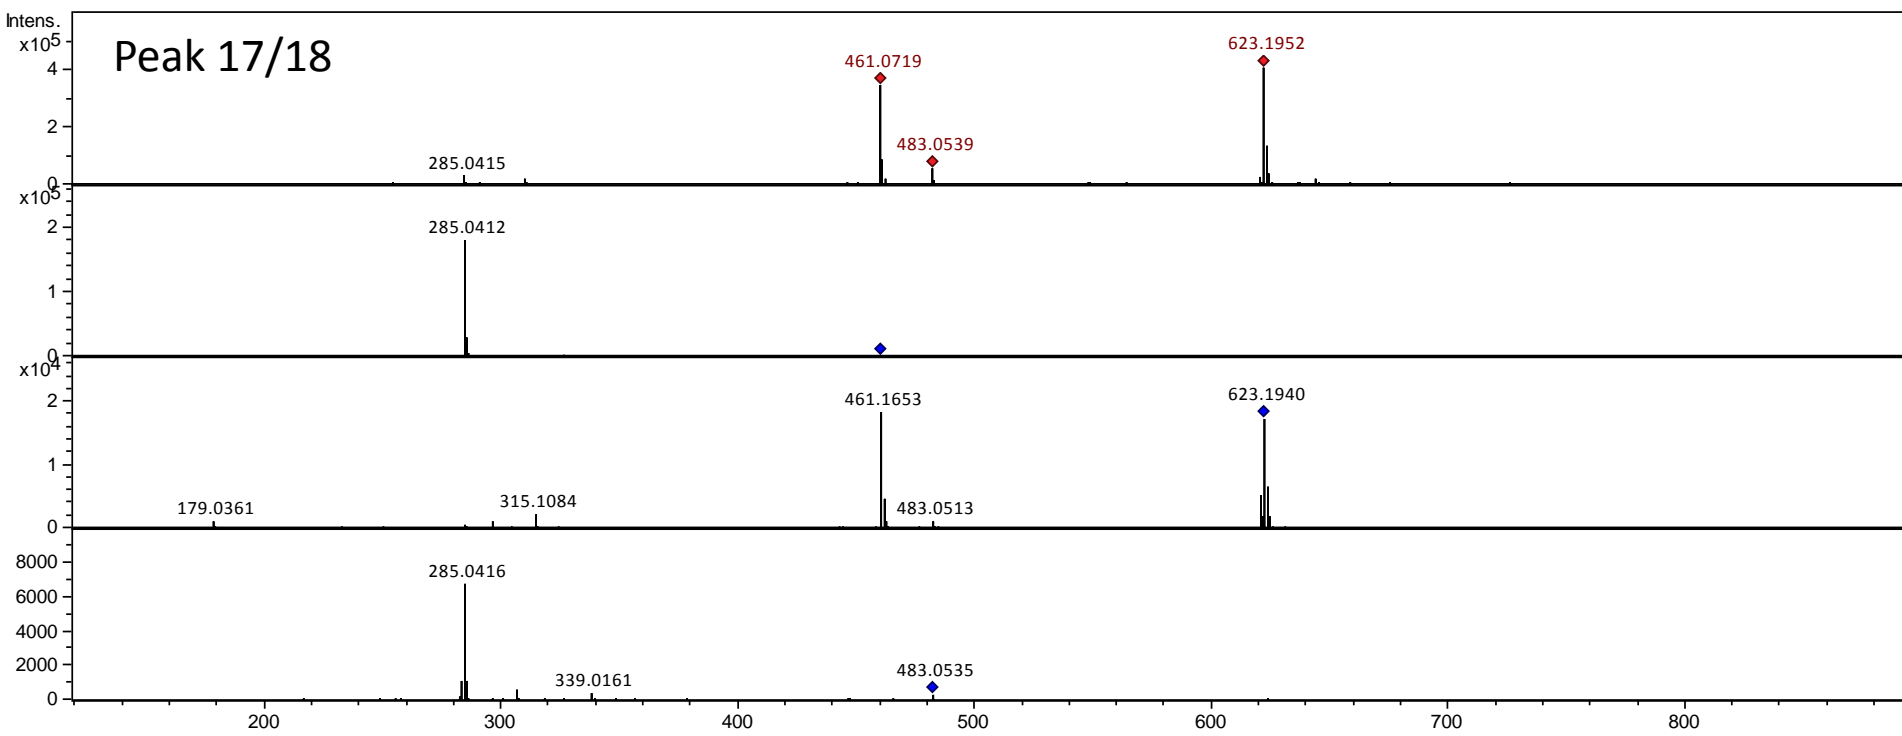

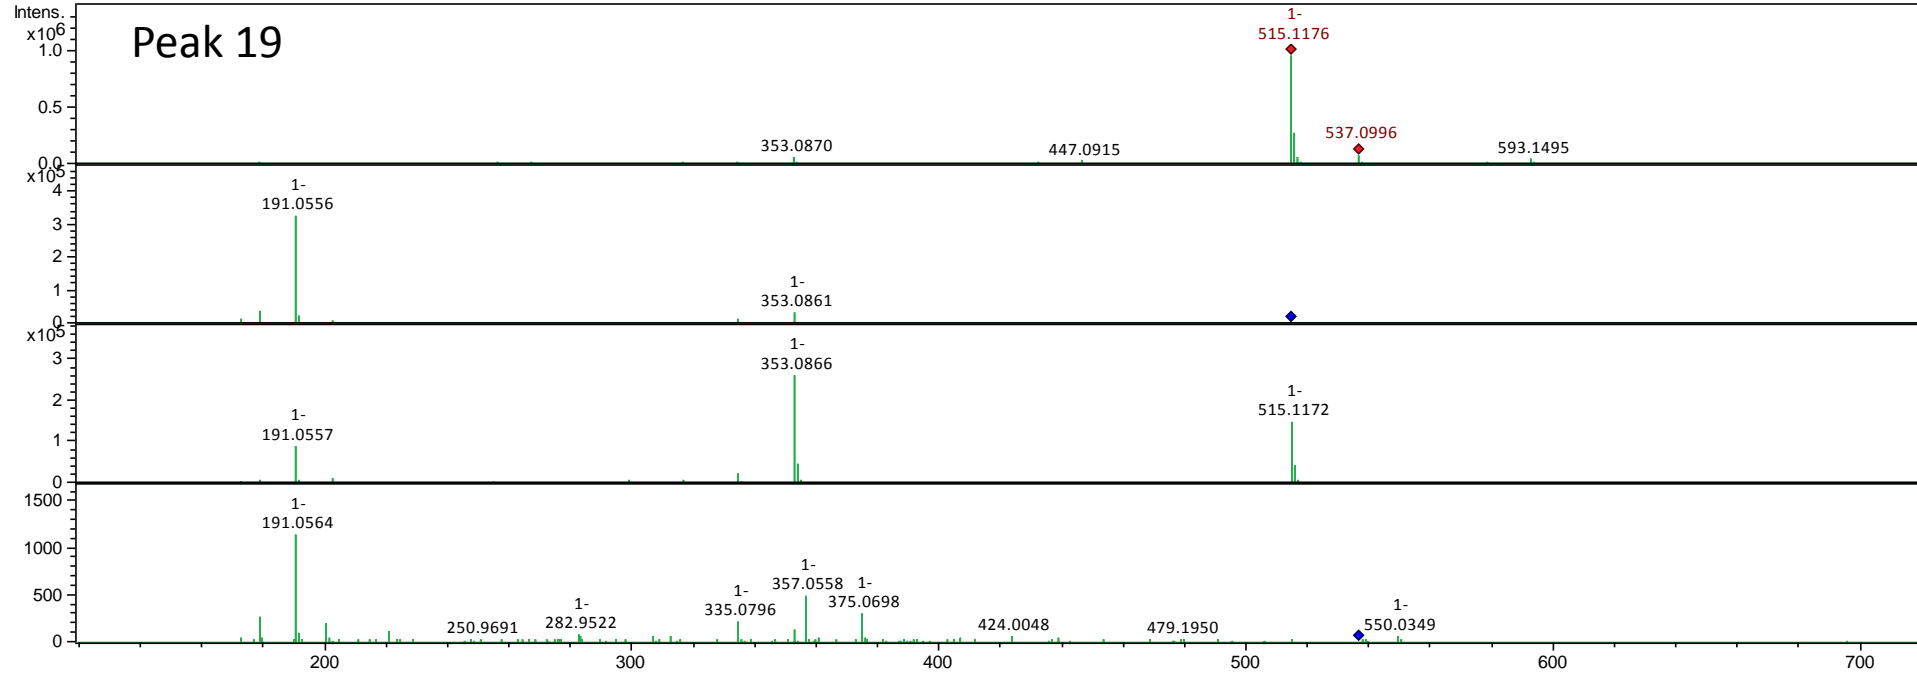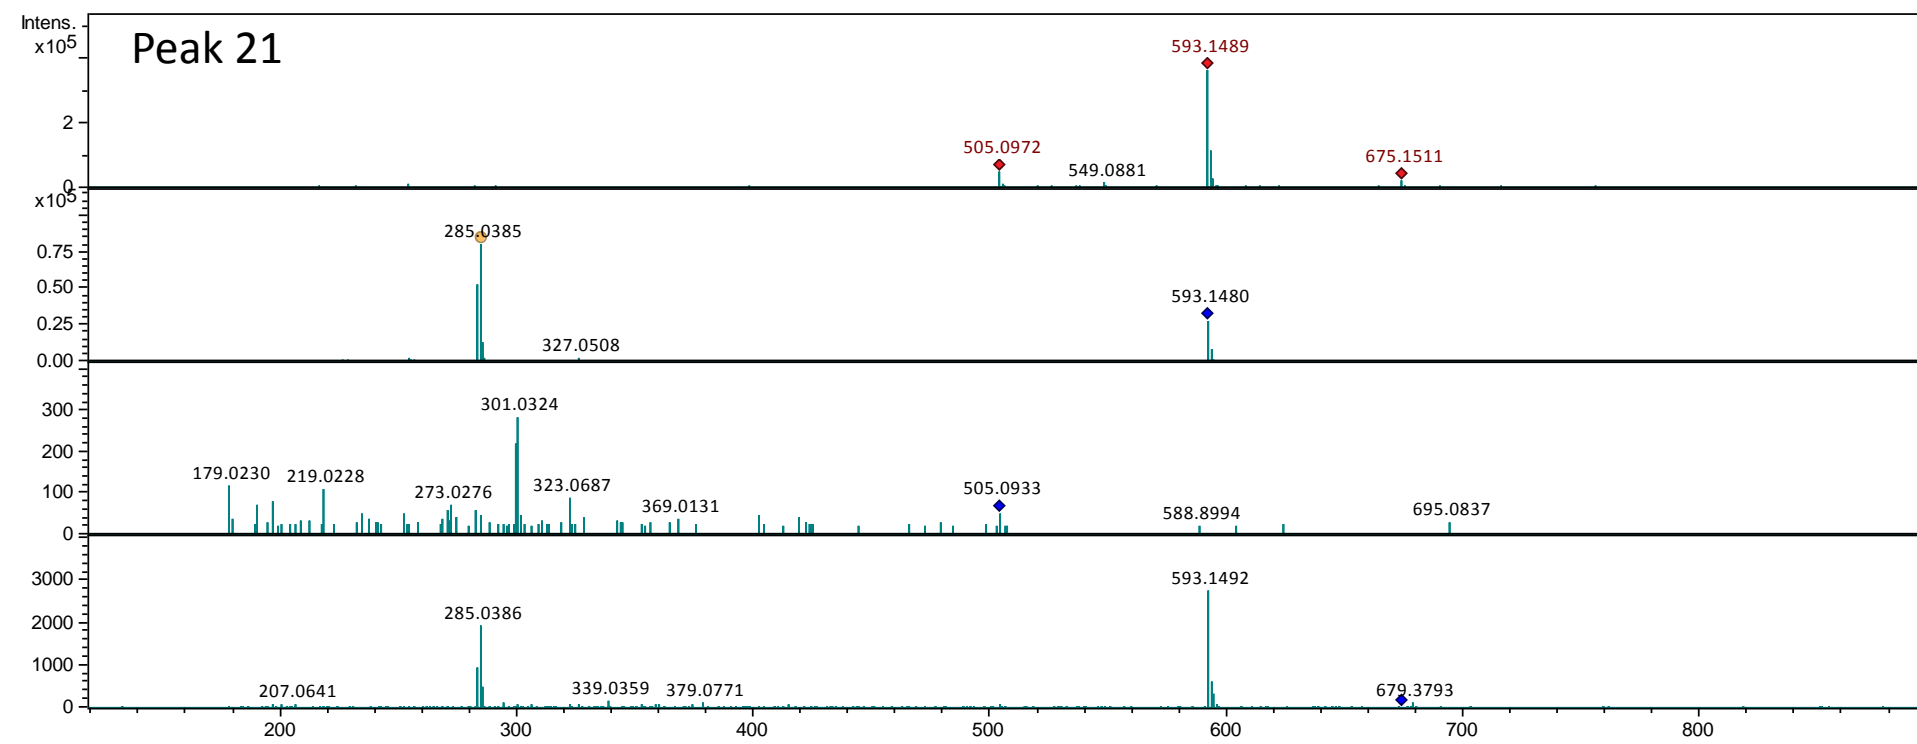

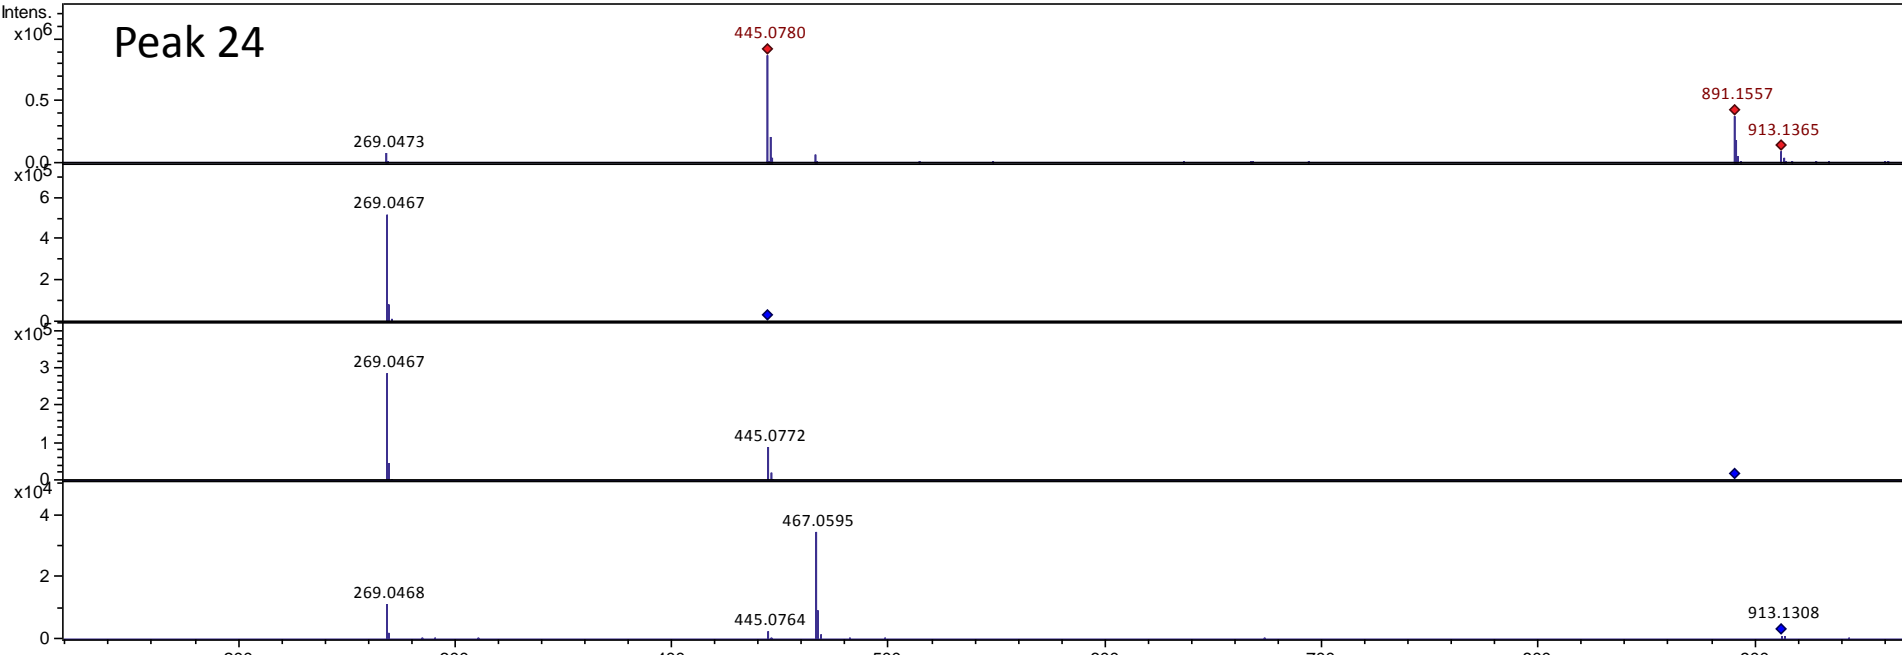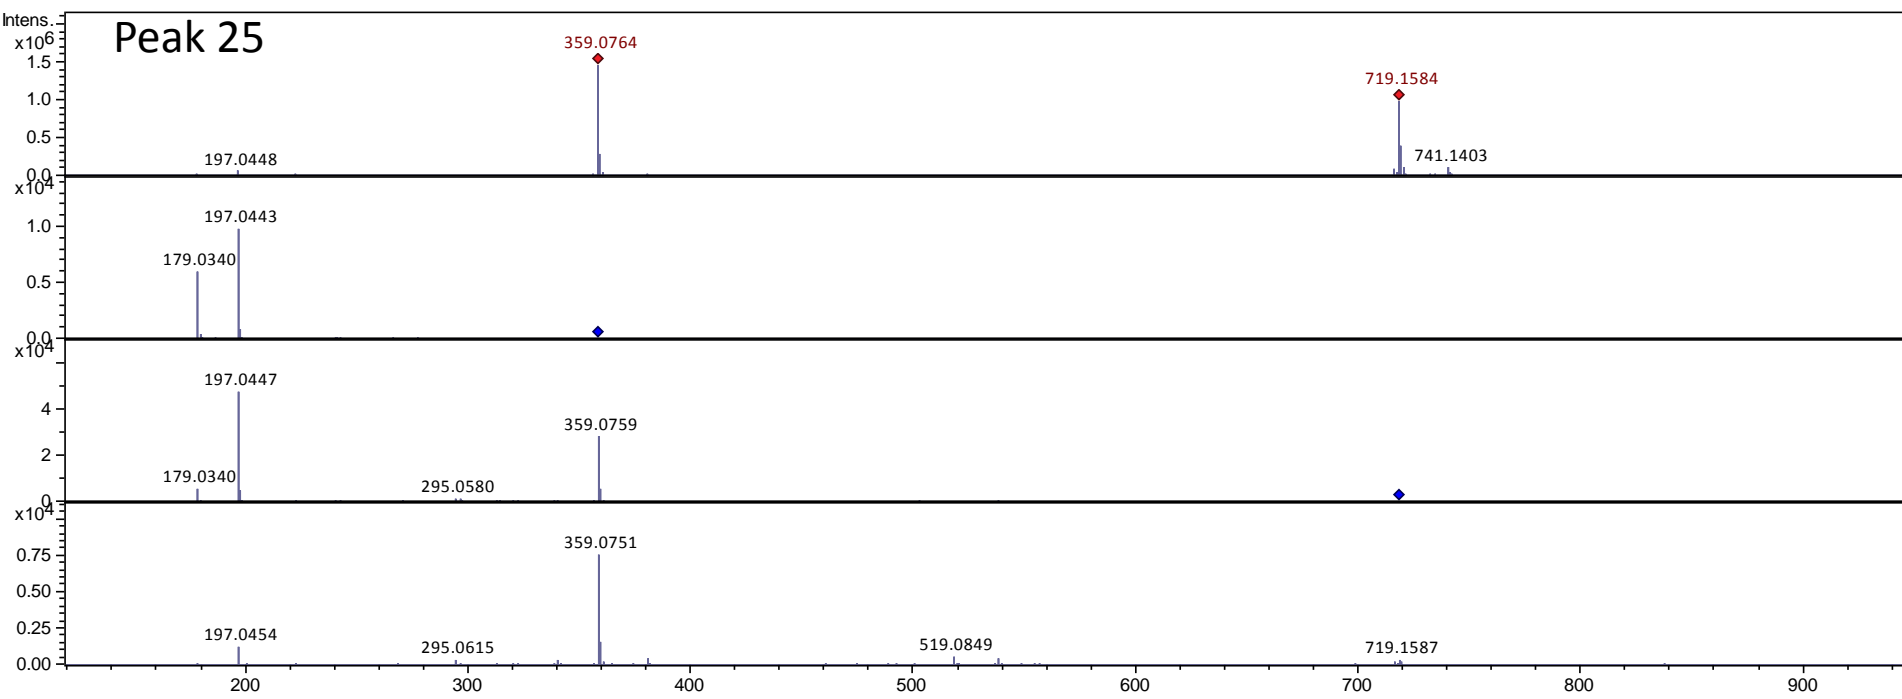



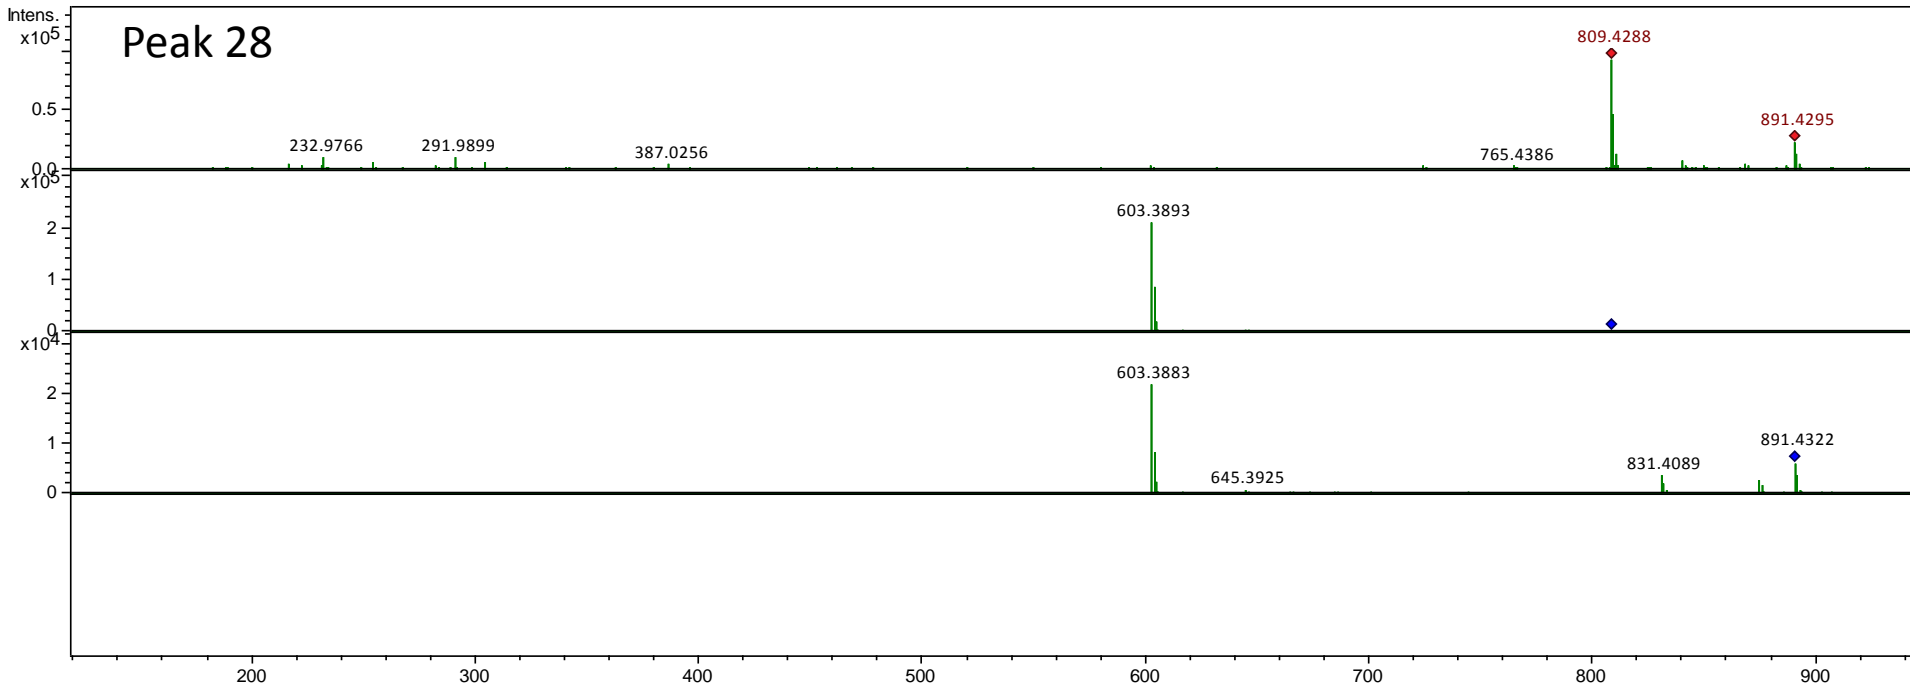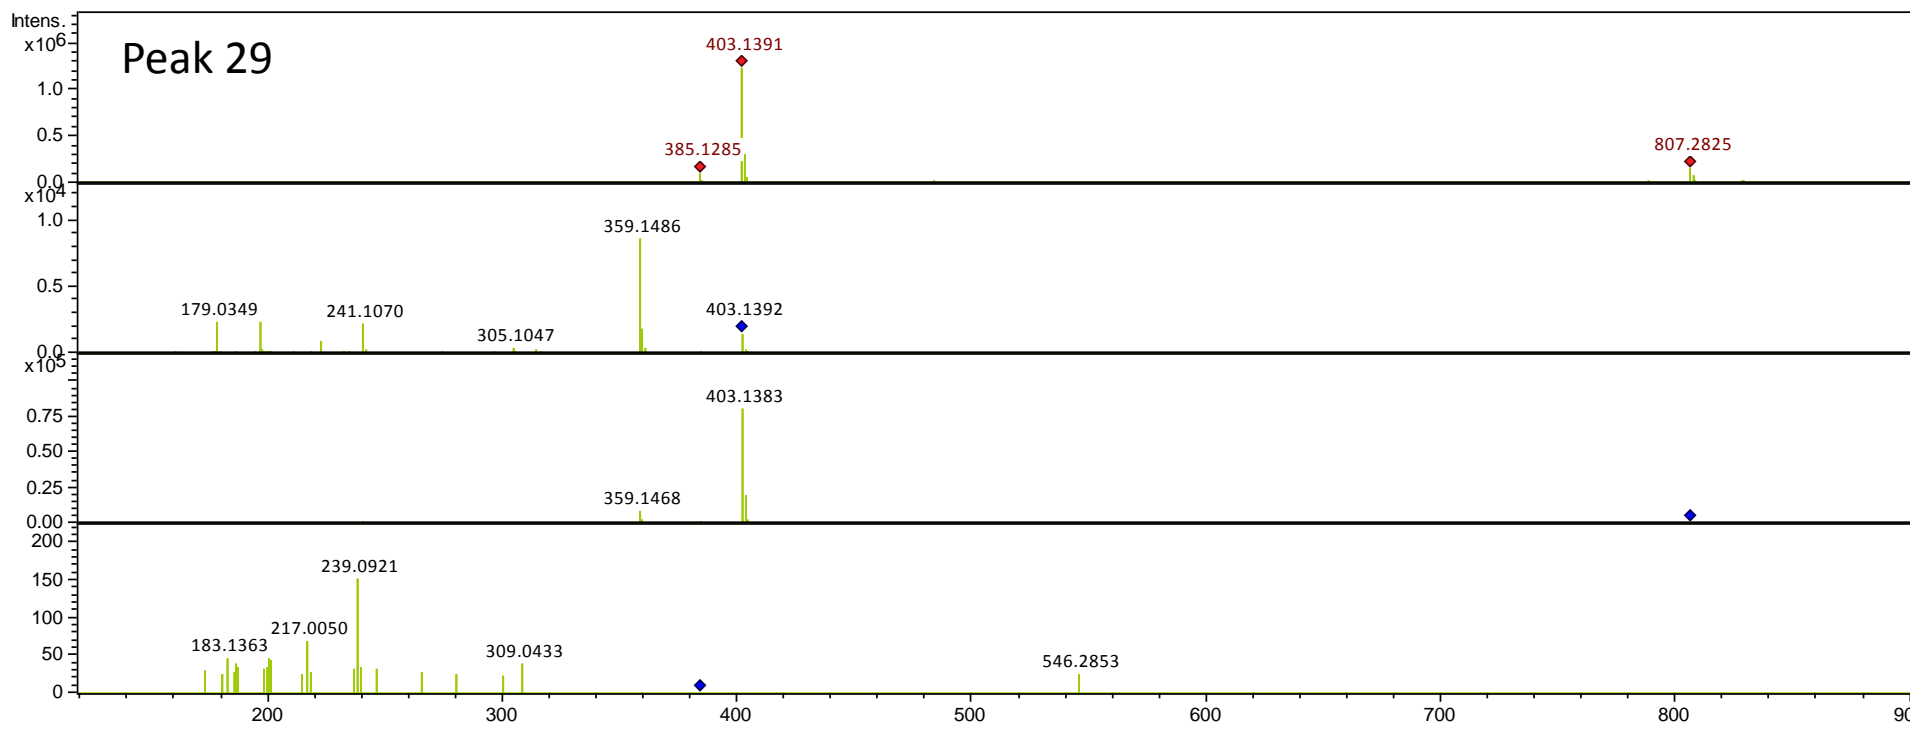

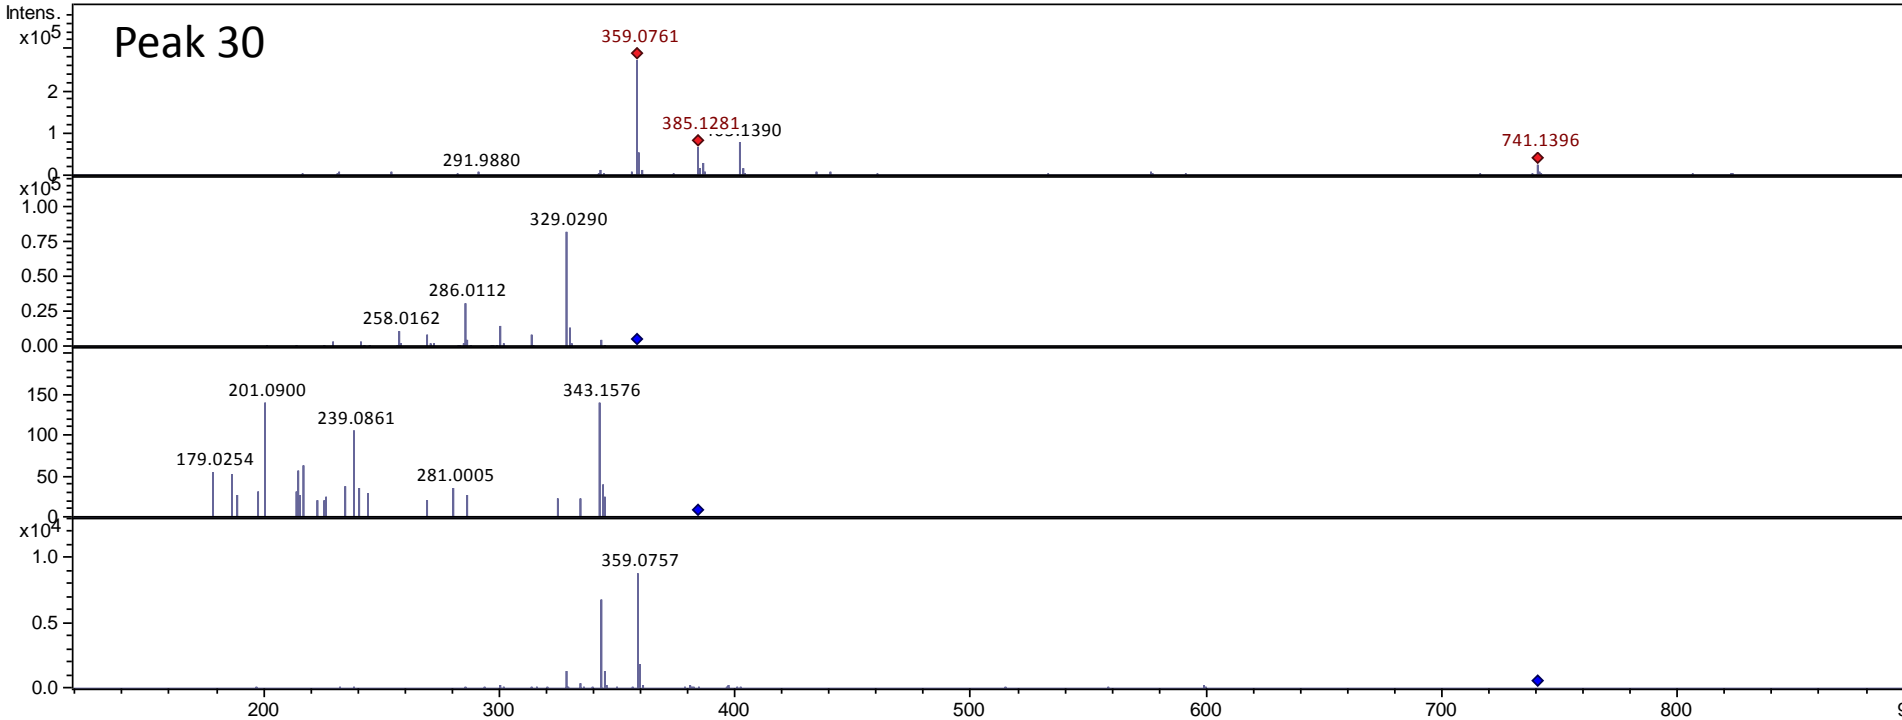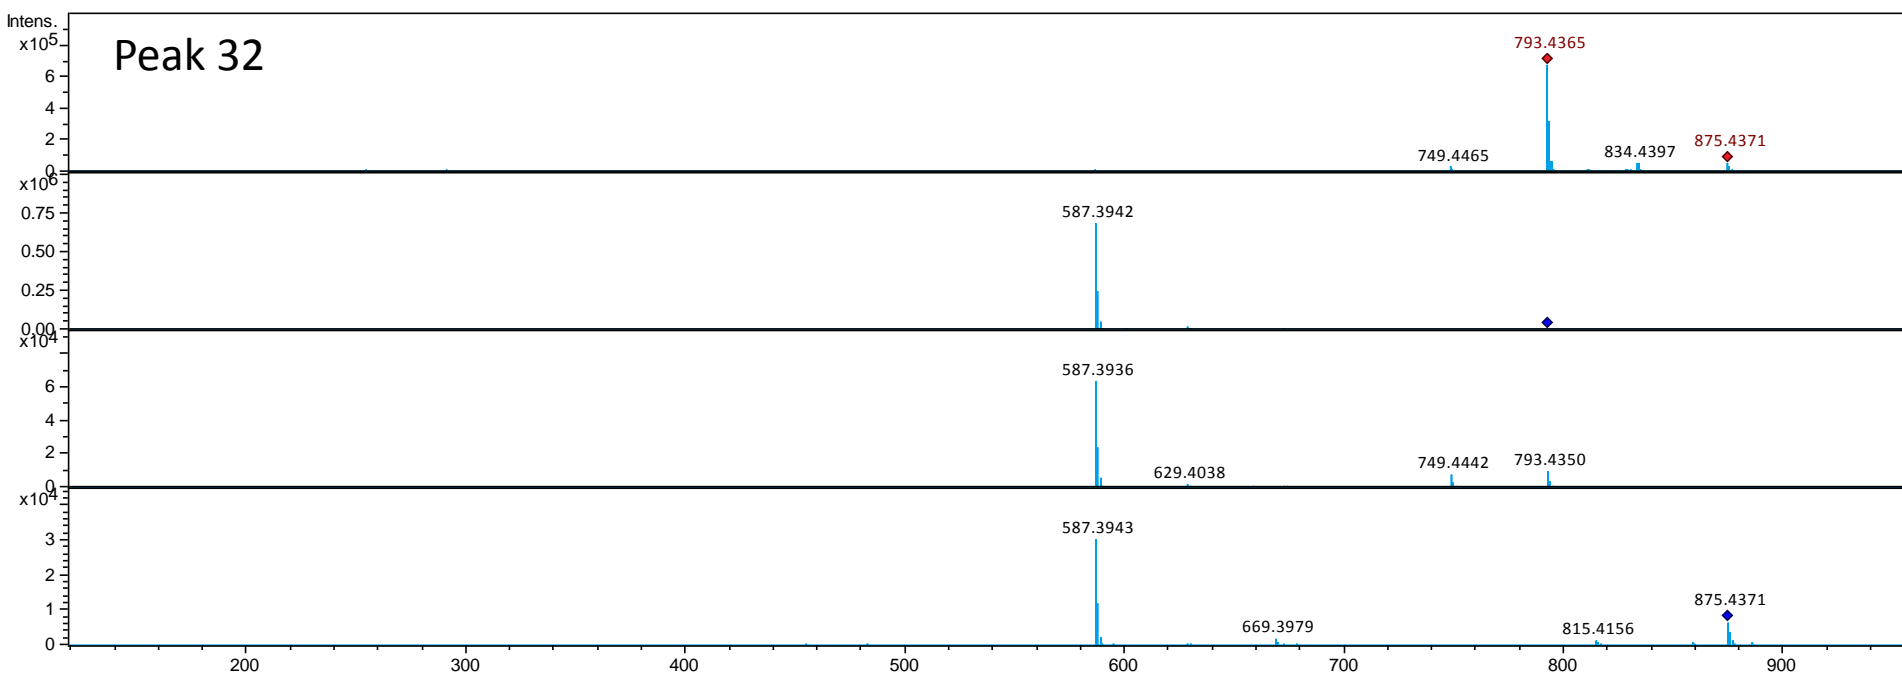

# Peak 33

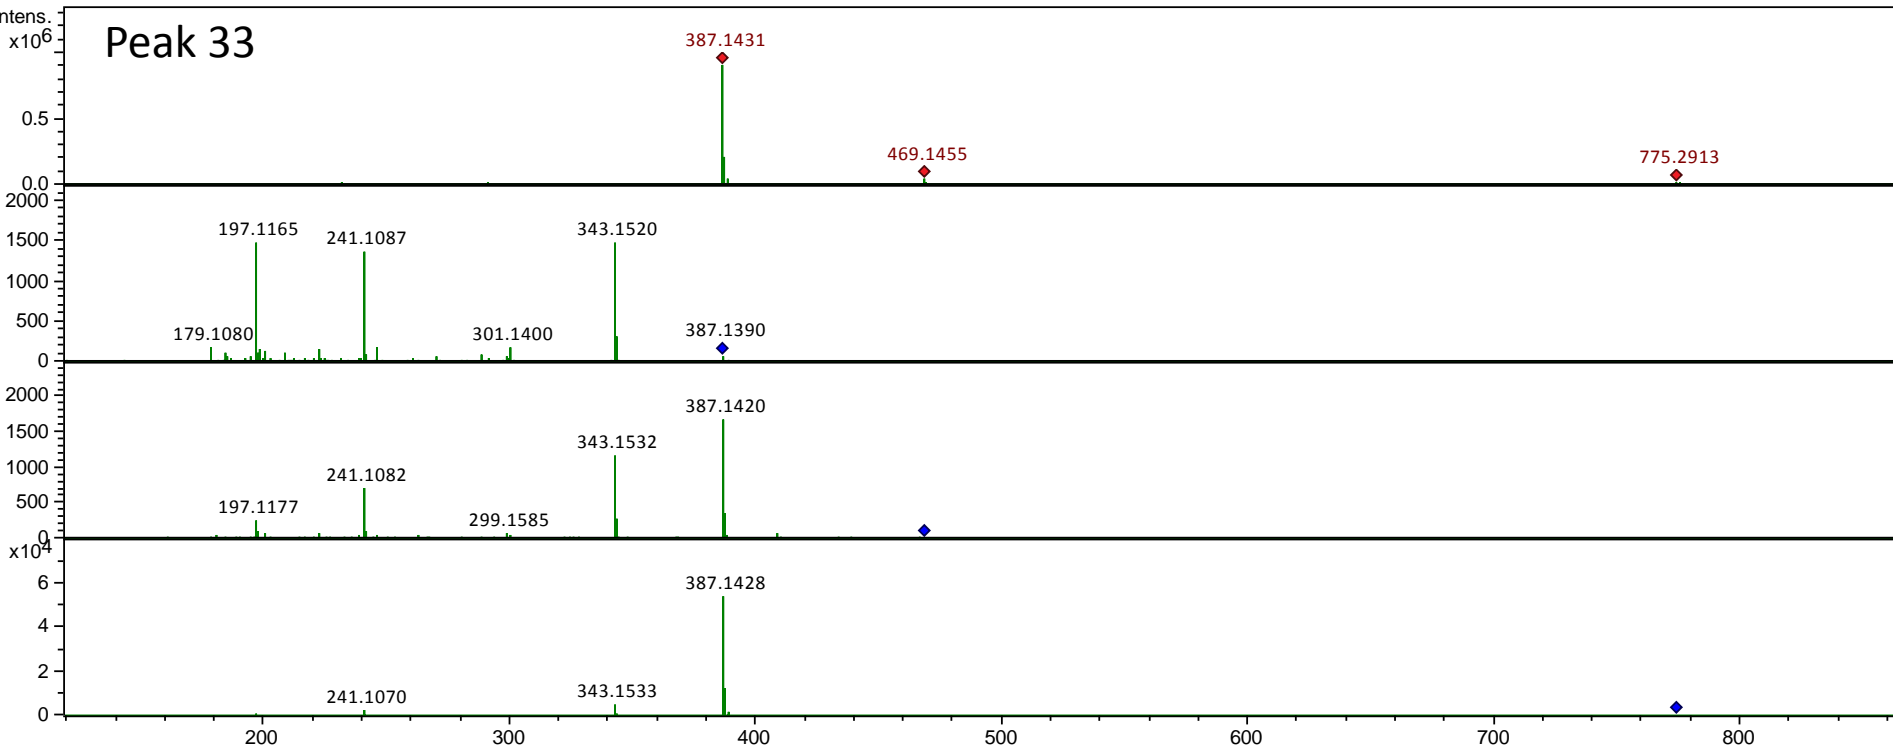

Supplement: pone.0211237.s002.pdf [file pone.0211237.s002.pdf]
