# Supplementary material for: Discovery of potential ovicidal natural products using metabolomics
Source: PubMed Central journal article supplement (PMC6347362; doi:10.1371/journal.pone.0211237), 2019-01-25
Supplement: pone.0211237.s001.pdf [file pone.0211237.s001.pdf]

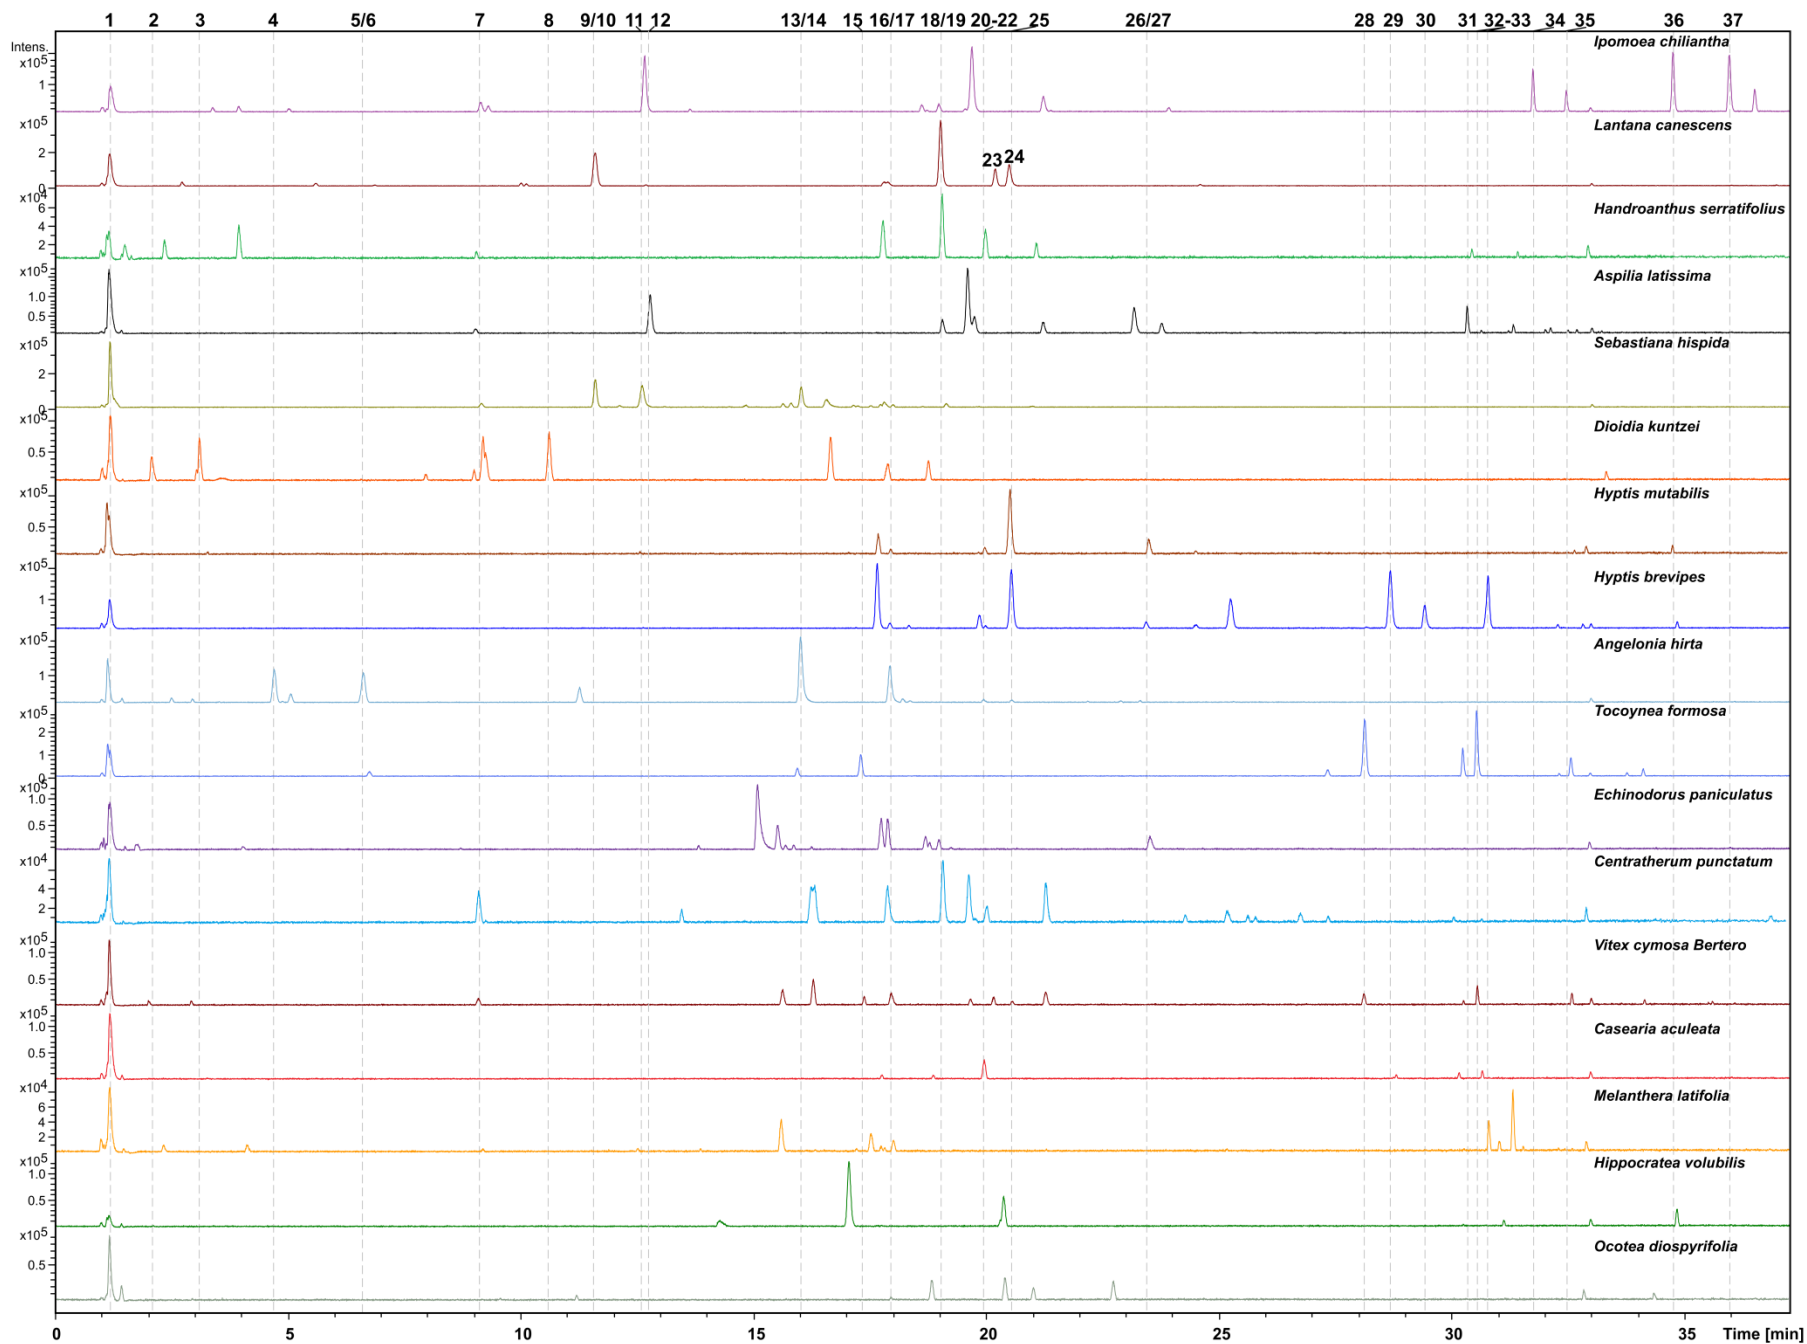

**S1 Fig.** - Total ion chromatogram in the negative ion mode of extract of plants evaluated for ovicidal activity against *Haemonchus placei*. Number 1-37 were related to the compounds identified in the table 4.
