# Supplementary material for: Discovery of potential ovicidal natural products using metabolomics
Source: PubMed Central journal article supplement (PMC6347362; doi:10.1371/journal.pone.0211237), 2019-01-25
Supplement: pone.0211237.s003.pdf [file pone.0211237.s003.pdf]

**S1 Table.** Retention time, mass, molecular formula, chemical class of compounds of figure 2 that were also positively correlated to EC<sub>90</sub> but with a relative intensity of masses lower than 20000.

| Peak       | Ret (min.) | [M-H] <sup>-</sup> | Molecular formula                                | Class           | Compounds             |
|------------|------------|--------------------|--------------------------------------------------|-----------------|-----------------------|
| Unknown 11 | 1.23       | 173.0414           | ---                                              | ---             | Unknown               |
| Unknown 12 | 1.50       | 290.0878           | ---                                              | ---             | Unknown               |
| Unknown 13 | 2.34       | 345.1222           | C <sub>15</sub> H <sub>22</sub> O <sub>9</sub>   | ---             | Unknown               |
| Unknown 14 | 2.49       | 423.1480           | C <sub>17</sub> H <sub>28</sub> O <sub>12</sub>  | ---             | Unknown               |
| Unknown 16 | 3.93       | 353.0878           | C <sub>16</sub> H <sub>18</sub> O <sub>9</sub>   | Phenylpropanoid | Caffeoylquinic acid   |
| Unknown 18 | 10.01      | 389.1042           | C <sub>16</sub> H <sub>22</sub> O <sub>11</sub>  | ---             | Unknown               |
| Unknown 19 | 10.50      | 473.1292           | C <sub>20</sub> H <sub>26</sub> O <sub>13</sub>  | ---             | Unknown               |
| Unknown 20 | 11.27      | 381.0933           | C <sub>15</sub> H <sub>23</sub> ClO <sub>9</sub> | ---             | Unknown               |
| Unknown 25 | 16.49      | 596.1331           | C <sub>26</sub> H <sub>28</sub> O <sub>16</sub>  | Flavonol        | Unknown               |
| Unknown 26 | 16.62      | 475.0306*          | C <sub>41</sub> H <sub>28</sub> O <sub>27</sub>  | ---             | Unknown               |
| Unknown 30 | 17.86      | 453.0379*          | C <sub>40</sub> H <sub>28</sub> O <sub>25</sub>  | ---             | Unknown               |
| Unknown 32 | 18.63      | 515.1163           | C <sub>25</sub> H <sub>24</sub> O <sub>12</sub>  | Phenylpropanoid | Dicaffeoylquinic acid |
| Unknown 34 | 18.80      | 591.1653           | C <sub>35</sub> H <sub>28</sub> O <sub>9</sub>   | ---             | Unknown               |
| Unknown 35 | 19.00      | 607.1591           | C <sub>35</sub> H <sub>28</sub> O <sub>10</sub>  | ---             | Unknown               |
| Unknown 36 | 19.16      | 433.0755           | C <sub>20</sub> H <sub>18</sub> O <sub>11</sub>  | ---             | Unknown               |
| Unknown 42 | 21.13      | 507.1467           | C <sub>24</sub> H <sub>28</sub> O <sub>12</sub>  | Phenylpropanoid | Unknown               |
| Unknown 43 | 23.20      | 677.1498           | C <sub>34</sub> H <sub>30</sub> O <sub>15</sub>  | ---             | Unknown               |
| Unknown 44 | 23.79      | 677.1491           | C <sub>34</sub> H <sub>30</sub> O <sub>15</sub>  | ---             | Unknown               |
| Unknown 45 | 23.95      | 421.2035           | C <sub>19</sub> H <sub>34</sub> O <sub>10</sub>  | ---             | Unknown               |
| Unknown 47 | 30.27      | 793.9424           | C <sub>42</sub> H <sub>66</sub> O <sub>14</sub>  | ---             | Unknown               |
| Unknown 53 | 31.36      | 558.2535*          | C <sub>57</sub> H <sub>82</sub> O <sub>22</sub>  | ---             | Unknown               |
| Unknown 55 | 32.16      | 939.4924           | C <sub>48</sub> H <sub>76</sub> O <sub>18</sub>  | ---             | Unknown               |
| Unknown 57 | 32.85      | 399.1429           | C <sub>22</sub> H <sub>24</sub> O <sub>7</sub>   | ---             | Unknown               |

\*[M-2H]<sup>-2</sup>
